# Supplementary material
Source: PubMed Central journal article supplement (PMC1914136)

**Supplemental Figure S1.** Map-based cloning of DAS734-resistance mutation in resistant line R03. The horizontal line represents a segment of the mapped chromosome 4 and the vertical lines indicate the position of the markers used in fine-mapping experiments.

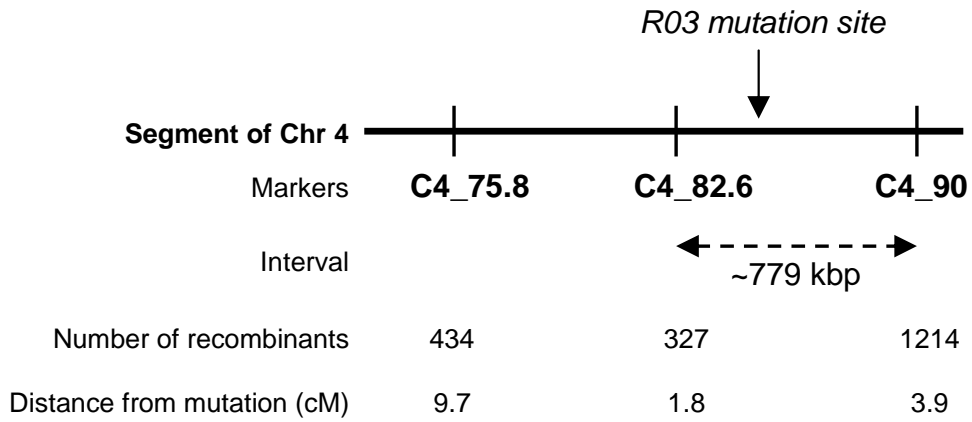

Supplement: plntphys_pp.107.099705_1.pdf [file plntphys_pp.107.099705_1.pdf]
