# Supplementary material
Source: PubMed Central journal article supplement (PMC1914136)

**Supplemental Figure S2.** Enzyme kinetic characterization of *E. coli*-expressed AtGPRAT2 and inhibition by DAS734. GPRAT activity was followed by measuring the PRPP-dependent production of glutamate with a glutamate dehydrogenase-coupled assay after heat-quenching of the reaction. Data were fitted to the appropriate kinetic equations using Grafit Software (Erithacus Software, UK). A,  $K_m$  determination for glutamine. The PRPP concentration was held constant at 2.5 mM. The data were fitted to the Michaelis-Menten equation yielding a  $K_m$  for glutamine of 1.34 mM. B, Effect of increasing concentrations of DAS734 on GPRAT activity. Reactions were performed at concentrations of DAS734 as indicated above the curves ( $\mu\text{M}$ ) and 2.5 mM PRPP. Curves were fitted to a noncompetitive inhibition equation yielding an apparent  $K_i$  for DAS734 of 22  $\mu\text{M}$  and a  $K_m$  for glutamine of 1.5 mM.

**A**

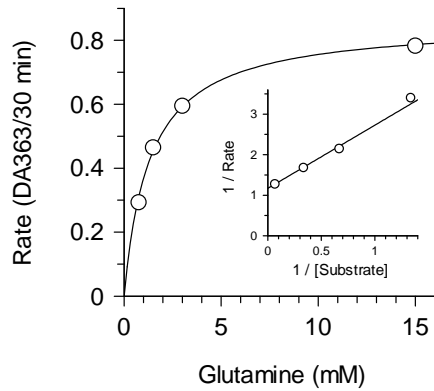

**B**

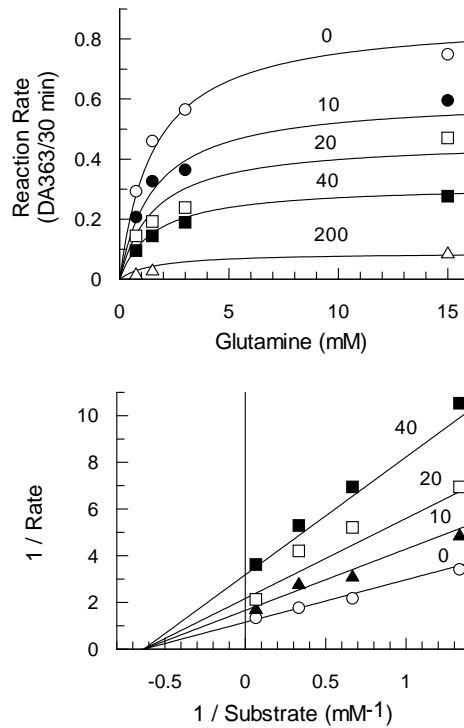

Supplement: plntphys_pp.107.099705_2.pdf [file plntphys_pp.107.099705_2.pdf]
